# Supplementary material for: Analysis of Microarray-Identified Genes and MicroRNAs Associated with Idiopathic Pulmonary Fibrosis
Source: Hindawi journal article supplement (doi:10.1155/2017/1804240), 2017-01-01
Supplement: f1 [file 1804240.f1.pdf]

Supplementary Table1. 67 differentially expressed genes and their associated with clinical parameters and patient subgroups

| Gene name      | Gene ID       | p-value(Age)*   | p-value(Gender)* | p-value(Smoking)* | two-tailed ttest<br>p-value(Cluster II/<br>I )# | fold<br>change(Cluster II/<br>I )# |
|----------------|---------------|-----------------|------------------|-------------------|-------------------------------------------------|------------------------------------|
| <b>VIPR1</b>   | <b>7433</b>   | 0.126177        | 0.136686         | 0.344265          | 1.17E-15                                        | -2.49                              |
| <b>SLC6A4</b>  | <b>6532</b>   | 0.385541        | <b>0.041142</b>  | 0.118514          | 2.08E-17                                        | -5.47                              |
| <b>NECAB1</b>  | <b>64168</b>  | 0.685413        | 0.332522         | 0.739776          | 2.20E-08                                        | -1.56                              |
| <b>LEPREL1</b> | <b>55214</b>  | 0.654459        | 0.263689         | 0.322482          | 1.20E-14                                        | -2.1                               |
| <b>ITLN2</b>   | <b>142683</b> | <b>0.006581</b> | 0.244348         | 0.616338          | 4.51E-08                                        | -1.44                              |
| <b>HSD17B6</b> | <b>8630</b>   | 0.206396        | <b>0.029763</b>  | 0.31042           | 3.74E-05                                        | -1.56                              |
| <b>HHIP</b>    | <b>64399</b>  | 0.241573        | 0.068495         | 0.13725           | 3.20E-12                                        | -2.3                               |
| <b>GALNT18</b> | <b>374378</b> | /               | /                | /                 | /                                               | /                                  |
| <b>CRTAC1</b>  | <b>55118</b>  | 0.444776        | <b>0.043385</b>  | 0.0983701         | 0.000207                                        | -1.37                              |
| <b>BTNL9</b>   | <b>153579</b> | <b>0.019168</b> | 0.112721         | 0.636179          | /                                               | /                                  |
| ZNF521         | 25925         | 0.142374        | 0.828389         | 0.39197           | /                                               | /                                  |
| TRIM2          | 23321         | 0.794137        | 0.625703         | 0.729964          | 6.12E-15                                        | 1.58                               |
| TP63           | 8626          | 0.774225        | 0.585081         | 0.855383          | 1.44E-22                                        | 2.43                               |
| TNC            | 3371          | <b>0.010034</b> | <b>0.016104</b>  | 0.216074          | /                                               | /                                  |
| TMPRSS4        | 56649         | 0.154469        | 0.219443         | 0.485892          | 6.85E-26                                        | 3.31                               |
| THY1           | 7070          | 0.177           | 0.186278         | 0.398847          | /                                               | /                                  |
| TGFB3          | 7043          | 0.087113        | 0.322016         | 0.52223           | /                                               | /                                  |
| TDO2           | 6999          | <b>0.014915</b> | <b>0.022895</b>  | 0.390169          | /                                               | /                                  |
| SULF1          | 23213         | 0.629003        | 0.160292         | 0.90913           | /                                               | /                                  |
| SPP1           | 6696          | <b>0.031183</b> | <b>0.013325</b>  | 0.863561          | 1.66E-17                                        | 6.4                                |
| SIX4           | 51804         | 0.600289        | 0.211946         | 0.955197          | 5.43E-28                                        | 2.27                               |

|          |       |          |          |           |          |      |
|----------|-------|----------|----------|-----------|----------|------|
| SFRP4    | 6424  | 0.456407 | 0.626699 | 0.625528  | /        | /    |
| SFRP2    | 6423  | 0.625595 | 0.078456 | 0.339615  | /        | /    |
| SERPIND1 | 3053  | 0.097422 | 0.608744 | 0.642825  | /        | /    |
| PSD3     | 23362 | 0.013523 | 0.927144 | 0.156792  | /        | /    |
| POSTN    | 10631 | 0.63572  | 0.223909 | 0.723659  | /        | /    |
| PCDH7    | 5099  | 0.185517 | 0.927286 | 0.511955  | /        | /    |
| PAMR1    | 25891 | 0.592354 | 0.353737 | 0.363404  | /        | /    |
| MXRA5    | 25878 | 0.870662 | 0.666444 | 0.375889  | /        | /    |
| MMP7     | 4316  | 0.41145  | 0.303077 | 0.331552  | /        | /    |
| MMP1     | 4312  | 0.078438 | 0.266318 | 0.349474  | 2.75E-15 | 5.46 |
| LTBP1    | 4052  | 0.014039 | 0.543222 | 0.11248   | /        | /    |
| LRRN1    | 57633 | 0.651246 | 0.936766 | 0.484772  | /        | /    |
| LRRC17   | 10234 | 0.79711  | 0.013604 | 0.737823  | /        | /    |
| LPPR4    | 9890  | 0.526718 | 0.622418 | 0.134065  | /        | /    |
| LAMP5    | 24141 | /        | /        | /         | /        | /    |
| ITGB8    | 3696  | 0.246252 | 0.263522 | 0.608421  | 9.06E-16 | 1.68 |
| IL13RA2  | 3598  | 0.060767 | 0.265732 | 0.658137  | /        | /    |
| IGKC     | 3514  | 0.196328 | 0.749822 | 0.430495  | /        | /    |
| IGK      | 50802 | /        | /        | /         | /        | /    |
| IGHV3-48 | 28424 | 0.306925 | 0.27175  | 0.325836  | /        | /    |
| IGF1     | 3479  | 0.177857 | 0.053143 | 0.0738912 | /        | /    |
| GOLM1    | 51280 | 0.369403 | 0.021218 | 0.58186   | 2.99E-24 | 1.86 |
| FNDC1    | 84624 | 0.824688 | 0.538236 | 0.390894  | /        | /    |
| FAM83D   | 81610 | 0.508339 | 0.059263 | 0.323836  | /        | /    |
| EPHA3    | 2042  | 0.054568 | 0.014852 | 0.831154  | /        | /    |
| DIO2     | 1734  | 0.41374  | 0.001194 | 0.136475  | /        | /    |

---

|          |           |          |          |           |          |      |
|----------|-----------|----------|----------|-----------|----------|------|
| DCLK1    | 9201      | 0.668455 | 0.2099   | 0.93869   | /        | /    |
| CXCL14   | 9547      | 0.115706 | 0.827791 | 0.463199  | /        | /    |
| CTSK     | 1513      | 0.227509 | 0.602957 | 0.729709  | /        | /    |
| CP       | 1356      | 0.713253 | 0.037292 | 0.942669  | 1.59E-25 | 4.29 |
| COMP     | 1311      | 0.464452 | 0.411721 | 0.842376  | /        | /    |
| COL6A3   | 1293      | 0.224806 | 0.083998 | 0.592143  | /        | /    |
| COL3A1   | 1281      | 0.122769 | 0.062236 | 0.683391  | /        | /    |
| COL1A1   | 1277      | 0.131306 | 0.057385 | 0.867915  | /        | /    |
| COL17A1  | 1308      | 0.273684 | 0.618873 | 0.792419  | 7.36E-16 | 1.84 |
| COL15A1  | 1306      | 0.483959 | 0.368165 | 0.215703  | /        | /    |
| CLIC6    | 54102     | 0.231958 | 0.301658 | 0.974105  | 4.12E-23 | 2.49 |
| CLDN1    | 9076      | /        | /        | /         | /        | /    |
| CFH      | 3075      | 0.083555 | 0.19109  | 0.0400911 | /        | /    |
| CDH3     | 1001      | 0.009559 | 0.448395 | 0.411104  | 8.01E-10 | 1.6  |
| CDH2     | 1000      | 0.46148  | 0.289592 | 0.0335855 | /        | /    |
| CD24     | 100133941 | 0.2313   | 0.152439 | 0.154109  | 1.44E-15 | 2.12 |
| CCDC80   | 151887    | 0.51957  | 0.600835 | 0.561529  | /        | /    |
| C12orf75 | 387882    | 0.157218 | 0.773873 | 0.755695  | 2.67E-01 | 1.59 |
| ASPN     | 54829     | 0.008958 | 0.91816  | 0.0741792 | /        | /    |
| IGKV3-20 | 28912     | /        | /        | /         | /        | /    |

\* Data came from reference(14) Supplemental Table S2. Transcripts that differentiate IPF/UIP from controls at 5%FDR

# Data came from reference(14) Supplemental Table S3. Transcripts in cluster A with statistics for expression levels in clusters I and II.

**Supplementary Table 2. 17 microRNAs and their target genes existed in DEGs of three common mRNA datasets**

| <b>microRNA</b> | <b>LogFc</b> | <b>Target</b> |         |         |        |       |        |
|-----------------|--------------|---------------|---------|---------|--------|-------|--------|
| hsa-let7b-5p    | -1.0305441   | CLDN1         | COL15A1 | COL1A1  | COL3A1 | ITGB8 | LRRC17 |
| hsa-mir-29a-3p  | -1.2426434   | CLDN1         | COL15A1 | COL1A1  | COL3A1 | DIO2  |        |
| hsa-mir-19b-3p  | -1.285607    | TRIM2         | SIX4    | ZNF521  | IGF1   | ITGB8 | FAM83D |
| hsa-mir-15a-5p  | -1.274762    | TRIM2         | SIX4    | LEPREL1 |        |       |        |
| hsa-mir-15b-5p  | -1.5444445   | TRIM2         | SIX4    | LEPREL1 |        |       |        |
| hsa-mir-130-3p  | -1.6770333   | TRIM2         | IGF1    | ITGB8   |        |       |        |
| hsa-mir-130b-3p | -1.0770705   | TRIM2         | IGF1    | ITGB8   |        |       |        |
| hsa-mir-181-5p  | -1.1743572   | TRIM2         | ITGB8   |         |        |       |        |
| hsa-mir-18a-5p  | -1.4527038   | TRIM2         | PSD3    |         |        |       |        |
| hsa-mir-30a-5p  | -1.3923532   | ZNF521        | SIX4    |         |        |       |        |
| hsa-mir-30d-3p  | -1.3825413   | ZNF521        | SIX4    |         |        |       |        |
| hsa-mir-92a-3p  | -1.0715239   | ZNF521        | PCDH7   |         |        |       |        |
| hsa-mir-193a-3p | -1.6402524   | SIX4          | DIO2    |         |        |       |        |
| hsa-mir-20a-3p  | -1.1021217   | ITGB8         |         |         |        |       |        |
| hsa-mir-25-3p   | -1.1558484   | PCDH7         |         |         |        |       |        |
| hsa-mir-320d    | -1.1324349   | CDH2          |         |         |        |       |        |
| hsa-mir-425-5p  | -1.147462    | TNC           |         |         |        |       |        |

**Supplementary Table 3. The 17 differentially expressed genes that can be regulated by dysfunctional miRNAs of GSE32538 datasets.**

| Gene name | PPI-degree | miRNA | LogFc     |           |           |
|-----------|------------|-------|-----------|-----------|-----------|
|           |            |       | GSE32537  | GSE53845  | GSE10667  |
| COL1A1    | 15         | 2     | 1.7733242 | 2.0907325 | 3.1987429 |
| COL3A1    | 11         | 2     | 1.6166588 | 1.8811475 | 2.9565792 |
| TNC       | 8          | 1     | 1.4030198 | 1.8460075 | 1.2676364 |
| ITGB8     | 6          | 6     | 1.1520938 | 1.295175  | 1.1381997 |
| COL15A1   | 4          | 2     | 1.3335039 | 1.9484725 | 1.5684563 |
| CDH2      | 3          | 1     | 1.2781973 | 1.351365  | 2.7343814 |
| IGF1      | 3          | 3     | 1.0380336 | 1.3539825 | 2.8572972 |
| ZNF521    | 2          | 4     | 1.0190914 | 1.274905  | 1.0913039 |
| CLDN1     | 0          | 2     | 1.5182668 | 2.335575  | 1.6341026 |
| LRRC17    | 0          | 1     | 1.5244737 | 1.5028925 | 2.1294655 |
| DIO2      | 0          | 2     | 1.2931864 | 2.757095  | 2.9104809 |
| FAM83D    | 0          | 1     | 1.226981  | 1.47853   | 2.5953808 |
| SIX4      | 0          | 6     | 1.1132993 | 1.26075   | 2.8027957 |
| TRIM2     | 0          | 7     | 1.0588409 | 1.116125  | 1.2121226 |
| LEPREL1   | 0          | 2     | -1.155286 | -1.477928 | -1.194345 |
| PSD3      | 0          | 1     | 1.0770657 | 1.0512575 | 1.1602056 |
| PCDH7     | 0          | 2     | 1.0227611 | 1.1901525 | 1.3005977 |
